# Supplementary material
Source: PubMed Central journal article supplement (PMC6777613)
Supplement: 41431_2019_432_MOESM1_ESM.pdf [file 41431_2019_432_MOESM1_ESM.pdf]

## Supplementary Information File 1. Genotypes of the described canine ataxia-related variants in Malinois dogs.

| OMIA ID <sup>1</sup> | Gene ID | Gene symbol   | Variant                                                   | Reference                      | N (wt/wt)                                        | N (wt/mt)                                      | N (mt/mt) | OMIM ID counterpart <sup>2</sup> |
|----------------------|---------|---------------|-----------------------------------------------------------|--------------------------------|--------------------------------------------------|------------------------------------------------|-----------|----------------------------------|
| 002110-9615          | 489479  | <i>ATP1B2</i> | NC_006587.3(XM_546597.6):c.130_131insLT796559.1:g.50_276  | Mauri <i>et al</i> , 2017      | 5 <sup>A</sup>                                   | 0                                              | 0         | NA                               |
| 001820-9615          | 483745  | <i>CAPN1</i>  | NC_006600.3(XM_540866.5):c.344G>A                         | Forman <i>et al</i> , 2013     | 5 <sup>A</sup>                                   | 0                                              | 0         | 616907                           |
| 000078-9615          | 484024  | <i>GRM1</i>   | NC_006583.3(XM_005615490.3):c.2316_2317ins62 <sup>3</sup> | Zeng <i>et al</i> , 2011       | 5 <sup>A</sup>                                   | 0                                              | 0         | 614831,617691                    |
| 002097-9615          | 476548  | <i>ITPR1</i>  | NC_006602.3:g.12880740CTT[7_651]                          | Forman <i>et al</i> , 2015     | 5 <sup>A</sup>                                   | 0                                              | 0         | 117360,206700,606658             |
| 002089-9615          | 488635  | <i>KCNJ10</i> | NC_006620.3(XM_545752.6):c.627C>G                         | Gilliam <i>et al</i> , 2014    | 5 <sup>A</sup>                                   | 0                                              | 0         | 612780                           |
| 002089-9615          | 488635  | <i>KCNJ10</i> | NC_006620.3:g.22141027_22141028insC                       | Gast <i>et al</i> , 2016       | 4 <sup>A</sup> /11 <sup>H</sup> /52 <sup>R</sup> | 1 <sup>A</sup> /2 <sup>H</sup> /5 <sup>R</sup> | 0         | 612780                           |
| 002089-9615          | 488635  | <i>KCNJ10</i> | NC_006620.3(XM_545752.6):c.986T>C                         | Van Poucke <i>et al</i> , 2017 | 5 <sup>A</sup>                                   | 0                                              | 0         | 612780                           |
| 001913-9615          | 479277  | <i>RAB24</i>  | NC_006586.3(XM_536420.6):c.113A>C                         | Agler <i>et al</i> , 2014      | 5 <sup>A</sup>                                   | 0                                              | 0         | NA                               |
| 001692-9615          | 480409  | <i>SEL1L</i>  | NC_006590.3(XM_022422296.1):c.1972T>C                     | Kyöstilä <i>et al</i> , 2012   | 5 <sup>A</sup>                                   | 0                                              | 0         | NA                               |
| 002034-9615          | 474985  | <i>SNX14</i>  | NC_006594.3(XM_022426319.1):c.2653+1G>A                   | Fenn <i>et al</i> , 2016       | 5 <sup>A</sup>                                   | 0                                              | 0         | 616354                           |
| 002092-9615          | 483706  | <i>SPTBN2</i> | NC_006600.3(XM_005631422.3):c.5855_5862del                | Forman <i>et al</i> , 2012     | 5 <sup>A</sup>                                   | 0                                              | 0         | 600224,615386                    |

N: number of dogs with specified genotype in <sup>A</sup> affected (N=5) and <sup>H</sup> healthy (N=13) Malinois dog family members and <sup>R</sup> reference Malinois dogs (N=57)

<sup>1</sup> Online Mendelian Inheritance in Animals, OMIA. Faculty of Veterinary Science, University of Sydney, Sydney. URL: <http://omia.angis.org.au/> (accessed January 2019).

<sup>2</sup> Online Mendelian Inheritance in Man, OMIM. McKusick-Nathans Institute of Genetic Medicine, Johns Hopkins University, Baltimore, MD. URL: <https://omim.org/> (accessed January 2019).

<sup>3</sup> The 62-bp insertion comprises AAGACCCGCAACGTAAAAAAAAAATAAAAAAAAAAAAAAAAAAAAAAAAAAAAAAAAAAAAAAAAAA

Agler C, Nielsen DM, Urkasemins G, Singleton A, Tonomura N, Sigurdsson S *et al*. Canine hereditary ataxia in old english sheepdogs and gordon setters is associated with a defect in the autophagy gene encoding RAB24. *PLoS Genet* 2014; **10**: e1003991.

Fenn J, Bournnell M, Hitti RJ, Jenkins CA, Terry RL, Priestnall SL *et al*. Genome sequencing reveals a splice donor site mutation in the SNX14 gene associated with a novel cerebellar cortical degeneration in the Hungarian Vizsla dog breed. *BMC Genet* 2016; **17**: 123.

Forman OP, De Risio L, Stewart J, Mellersh CS, Beltran E. Genome-wide mRNA sequencing of a single canine cerebellar cortical degeneration case leads to the identification of a disease associated SPTBN2 mutation. *BMC Genet* 2012; **13**: 55.

Forman OP, De Risio L, Mellersh CS. Missense mutation in CAPN1 is associated with spinocerebellar ataxia in the Parson Russell Terrier dog breed. *PLoS One* 2013; **8**: e64627.

Forman OP, De Risio L, Matusiak K, Platt S, Mellersh C. Spinocerebellar ataxia in the Italian Spinone dog is associated with an intronic GAA repeat expansion in ITPR1. *Mamm Genome* 2015; **26**: 108-117.

Gast AC, Metzger J, Tipold A, Distl O. Genome-wide association study for hereditary ataxia in the Parson Russell Terrier and DNA-testing for ataxia-associated mutations in the Parson and Jack Russell Terrier. *BMC Vet Res* 2016; **12**: 225.

Gilliam D, O'Brien DP, Coates JR, Johnson GS, Johnson GC, Mhlanga-Mutangadura T *et al*. A homozygous KCNJ10 mutation in Jack Russell Terriers and related breeds with spinocerebellar ataxia with myokymia, seizures, or both. *J Vet Intern Med* 2014; **28**: 871-877.

Kyöstilä K, Cizinauskas S, Seppälä EH, Suhonen E, Jeserevics J, Sukura A *et al*. A SEL1L mutation links a canine progressive early-onset cerebellar ataxia to the endoplasmic reticulum-associated protein degradation (ERAD) machinery. *PLoS Genet* 2012; **8**: e1002759.

Mauri N, Kleiter M, Dietschi E, Leschnik M, Högl S, Wiedmer M *et al*. A SINE Insertion in ATP1B2 in Belgian Shepherd Dogs Affected by Spongy Degeneration with Cerebellar Ataxia (SDCA2). *G3 (Bethesda)* 2017; **7**: 2729-2737.

Van Poucke M, Stee K, Bhatti S, Vanhaesebrouck A, Bosseler L, Peelman LJ *et al*. The novel homozygous KCNJ10 c.986T>C (p.(Leu329Pro)) variant is pathogenic for the SeSAME/EAST homologue in Malinois dogs. *Eur J Hum Genet* 2017; **25**: 222-226.

Zeng R, Farias FH, Johnson GS, McKay SD, Schnabel RD, Decker JE *et al*. A truncated retrotransposon disrupts the GRM1 coding sequence in Coton de Tulear dogs with Bandera's neonatal ataxia. *J Vet Intern Med* 2011; **25**: 267-272.
