# Supplementary material
Source: PubMed Central journal article supplement (PMC6777613)
Supplement: 41431_2019_432_MOESM2_ESM.pdf [file 41431_2019_432_MOESM2_ESM.pdf]

**Supplementary Information File 2.** A summary of the clinical investigations performed in each of the 6 affected Malinois dogs.

| <b>Examination</b>                                        | <b>Dog 1</b> | <b>Dog 2</b> | <b>Dog 3</b> | <b>Dog 4</b> | <b>Dog 5</b> | <b>Dog 6</b> |
|-----------------------------------------------------------|--------------|--------------|--------------|--------------|--------------|--------------|
| Video footage                                             | +            | +            | +            | +            | +            | +            |
| Clinical and neurological examination                     | +            | +            | +            | +            | -            | -            |
| Complete blood count and serum biochemistry               | +            | +            | +            | +            | +            | -            |
| Cerebrospinal fluid (CSF) analysis                        | -            | +            | +            | +            | -            | -            |
| Urinalysis                                                | -            | +            | +            | -            | -            | -            |
| Electromyography (EMG)                                    | -            | +            | -            | +            | -            | -            |
| Motor nerve conduction velocity (MNCV)                    | -            | +            | -            | +            | -            | -            |
| Brainstem auditory evoked responses (BAER)                | -            | -            | +            | -            | -            | -            |
| Magnetic resonance imaging (MRI) of brain and spinal cord | -            | -            | -            | +            | -            | -            |
| Tissue sampling for genetic analysis                      | +            | -            | +            | -            | -            | -            |
| Post-mortem examination                                   | +            | +            | +            | +            | -            | -            |
