# Supplementary material
Source: PubMed Central journal article supplement (PMC6777613)
Supplement: 41431_2019_432_MOESM3_ESM.pdf [file 41431_2019_432_MOESM3_ESM.pdf]

**Supplementary Information File 3.** Genotypes of the *SLC12A6* NC\_006612.3(XM\_014109414.2): c.178\_181delinsCATCTCACTCAT variant in reference dog breed populations.

| Breed                  | N (wt/wt) | N (wt/vt) | N (vt/vt) | N (total) |
|------------------------|-----------|-----------|-----------|-----------|
| Australian shepherd    | 27        | 0         | 0         | 27        |
| Beagle                 | 25        | 0         | 0         | 25        |
| Border collie          | 25        | 0         | 0         | 25        |
| Dachshund              | 25        | 0         | 0         | 25        |
| English cocker spaniel | 25        | 0         | 0         | 25        |
| Fox terrier            | 14        | 0         | 0         | 14        |
| German shepherd        | 25        | 0         | 0         | 25        |
| Groenendaeler          | 50        | 0         | 0         | 50        |
| Jack russell terrier   | 28        | 0         | 0         | 28        |
| Lakenois               | 28        | 0         | 0         | 28        |
| Malinois               | 118       | 0         | 0         | 118       |
| Maltese                | 25        | 0         | 0         | 25        |
| Old English sheepdog   | 9         | 0         | 0         | 9         |
| Rottweiler             | 26        | 0         | 0         | 26        |
| Shetland sheepdog      | 25        | 0         | 0         | 25        |
| Tervueren              | 50        | 0         | 0         | 50        |
| Vizsla                 | 11        | 0         | 0         | 11        |
| Yorkshire terrier      | 26        | 0         | 0         | 26        |

N: number of animals

wt: wild type allele

vt: variant type allele
